# Supplementary material for: Quality control and correction method for air temperature data from a citizen science weather station network in Leuven, Belgium
Source: Copernicus journal article supplement (doi:10.5194/essd-2022-113), 2022-05-02
Supplement: Supplementary file [file essd-2022-113-AC1-supplement.pdf]

## Authors' response to RC1 - manuscript ESSD-2022-113

Responses to Reviewer comments: The text in blue represents the authors' reply. Text in italic represents text that was changed in the manuscript, with line numbers referring to those in the revised manuscript. We numbered the comments for easier referral.

### General comments:

My main remark is that the manuscript should highlight better the value of the data set itself for future research (which I think is high!), and that the developed and applied QC is relatively strictly focused on this type of data set and weather station. For example, one could not apply the QC to another crowdsourced data set of, e.g., Netatmo data (radiation data missing) or use it to quality control single/few stations (L1.3, L2).

My opinion is that the comprehensive data set and the fact that it is quality controlled to a high degree is the key selling point, not the developed QC itself. The fact that such a data set exists and that the network of stations will be maintained for some time (until when?) is great. I do not think that the QC is "easily transferable" to other cities, as you need a lot of measurement data for each station, which is not the case for most crowdsourced data sets. Thus I recommend to restructure the manuscript a bit to give more emphasis on the network (how set up, how maintained, by whom, ...) and the data (how collected, what is in the data set, ...), and a bit less on the QC. The data set itself on the repository should then be enhanced with additional material regarding meta data of the stations, e.g., Gubler et al. 2021 Supplementary Material (<https://doi.org/10.1016/j.uclim.2021.100817>).

**Reply:** We thank the reviewer for the thorough review and useful comments and suggestions that improved our manuscript. We have considered all your comments and revised the manuscript accordingly. Please see our point-by-point responses on the specific comments below.

We agree that the value of this dataset is of high relevance and has many useful applications. Those applications were currently not introduced in the manuscript. We incorporated them in an additional section; Section 6. Application potential of the quality controlled and corrected Leuven.cool dataset. The main applications are further summarised in the conclusion.

#### *'6. Application potential of the quality controlled and corrected Leuven.cool dataset*

*A validation of the proposed QC method showed that it can reduce the mean temperature difference and standard deviation from  $0.15 \pm 0.56$  °C to  $0.00 \pm 0.28$  °C. The QC method can correct the temperature difference equally across different hours of the day and months of the year (Figure 16) as well and under different radiation and windspeed conditions (Figure 17).*

*The quality-controlled Leuven.cool dataset enables a detailed comparison with other crowdsourced datasets for which less or even no metadata is available. As such, the Leuven.cool stations can serve as gatekeepers for other crowdsourced observations. In the past this role has been limited to standard weather station network which mostly only have a limited number of observations available (Chapman et al., 2017).*

*Numerous studies have shown that the UHI effect causes night time temperature differences up to 6 to 9 °C during clear nights (Chapman et al., 2017; Feichtinger et al., 2020; Napoly et al., 2018; Stewart, 2011; Venter et al., 2021). These thresholds are much higher than mean bias obtained after correction. The dense quality controlled Leuven.cool dataset thus allows for microscale modelling of urban weather patterns, including the urban heat island (Chapman et al., 2017; de Vos et al., 2020; Feichtinger et al., 2020; Napoly et al., 2018). Since such high-quality datasets contain measurements*

*with both high spatial and temporal resolution, they can easily be used to obtain spatially continuous temperature patterns across a region (e.g. Feichtinger et al., 2020; Napoly et al., 2018). Interpolation methods based on single pair stations or mobile transect methods are much less trustworthy (Napoly et al., 2018). Dense weather station networks can be used to investigate the inter- and intra LCZ variability within a city (Fenner et al., 2017; Verdonck et al., 2018). The dataset can further help investigate the relation between temperature and human and ecosystem health (e.g. Aerts et al., 2022; Troeyer et al., 2020) and their effect on evolutionary processes (e.g. Brans et al., 2022).*

*The dataset can also help refine existing weather forecast models which are currently mostly based on official rural observations (Sgoff et al., 2022). Nipen et al. (2020) showed that the inclusion of citizen observations improves the accuracy of short-term temperature forecasts in regions where official stations are sparse. Mandement & Caumont (2020) used crowdsourced weather stations to improve the observation and prediction of near convection. After quality control and correction, also the wind (Chen et al., 2021) and precipitation measurements (de Vos et al., 2019) can be useful to improve detection and forecasting. Further, the Leuven.cool dataset could be a useful input in air pollution prediction models (e.g. IFD-model (Lefebvre et al., 2011)).' (Lines 673-701)*

*'The quality-controlled Leuven.cool dataset enables a detailed comparison with other crowdsourced datasets for which less or even no metadata is available. The dense dataset further allows for microscale modelling of urban weather patterns, such as the urban heat island, and can help identify the relation between temperature and human and ecosystem and their effect on evolutionary processes. Lastly the dataset could be used to refine existing forecast models which are currently mostly based on official rural observations.'* (Lines 723-727)

**Reply:** We further agree that the QC method was built for this specific data set but believe that it can be adapted to similar crowdsourced datasets and regions. When no climate thresholds are directly available, thresholds can be based on existing climate classification maps (QC L1.1). If no estimation can be made, QC L1.1 can be removed. The QC method was built for weather station networks is thus less suitable to quality control single or few stations (QC L1.3, QC L2). Lastly, the random forest model (QC L3) is easily adaptable to the parameters that are available (we do acknowledge, however, that radiation is the most important parameter in the correction procedure). As an example, we could not use atmospheric pressure measurements in our case, since these were not correctly transferred by the receiver for many of the stations within the Leuven.cool network. In the conclusion paragraph, we summarised what is needed for the QC to be transferred to other regions

*'Afterwards the method can be applied independently of the official network that was used in the development phase. Transferring the method to other networks or regions would require the recalibration of the QC parameters. Specifically, for QC L1.1 some indication of climate thresholds is needed. QC L1.3 and QC L2 require a dense weather station network, the QC method is thus less suitable for single or few stations. For QC L3 quite some other data (e.g., radiation, windspeed, ...) are needed. The random forest model is however easily adaptable to the parameters that are available.'* (Lines 714-719)

**Reply:** To improve the usability of the dataset, the metadata on the data repository will be enhanced with the following parameters: installation height, LCZ, dominant landcover, mean SVF and mean building height in buffer of 10m around weather station.

### Specific comments:

1. Introduction: At some point when crowdsourced data is introduced, the authors should better highlight that this paper mainly deals with air-temperature data, especially regarding the QC.

**Reply:** We agree that the link to air temperature might not have been very clearly stated in the introduction. Within this introduction crowdsourced data is introduced as a promising solution to measure the urban heat island. The connection to air-temperature data seemed logic but was indeed not specified. The overview of currently existing QC methods did mostly focus on air-temperature data. We changed the introduction accordingly.

*'The rise of crowdsourced air-temperature data, especially in urban areas, could be a promising solution to bridge this knowledge gap (Muller et al., 2015).'* (Lines 56-57)

*Recent studies have therefore highlighted the importance of performing a data quality control in data processing applications (Båserud et al., 2020; Longman et al., 2018), especially before analysing crowdsourced air-temperature data (Bell et al., 2015; Chapman et al., 2017; Cornes et al., 2020; Feichtinger et al., 2020; Jenkins, 2014; Meier et al., 2017; Napoly et al., 2018; Nipen et al., 2020).* (Lines 69-72)

*'Current QC studies mostly identify and remove implausible temperature measurements (Chapman et al., 2017; Meier et al., 2017; Napoly et al., 2018), instead of correcting for known temperature biases (Cornes et al., 2020).'* (Lines 95-96)

2. Introduction: In what way is the current data set a “crowdsourcing” data set? Please explain better and compare with the definition of crowdsourcing (e.g. Muller et al. 2015). Or is it more citizen science?

**Reply:** We understand the confusion between both terms. The definition "crowdsourcing" and "citizen science" is still somehow fluid, and certainly not settled at this time.

Muller et al. (2015) states that crowdsourcing was traditionally defined as “obtaining data or information by enlisting the services of a (potentially large) number of people” but highlights that the definition should be expanded to include “and/or from a range of public sensors, typically connected via the Internet”. In the past, crowdsourcing was merely understood as the outsourcing of a certain task to the general public but in more recent years it is seen as the "lowest level" of citizen science, i.e., citizens contributing to sensing (see, e.g., the review article of Zheng et al. (2018)). Citizen science itself is then more broadly defined as "the involvement of citizens in science".

In this definition, the Leuven.cool weather station network is crowdsourcing in the first place, and hence also citizen science. The weather station of Leuven.cool are installed in both private gardens of citizens and semi-public locations in Leuven. The volunteering citizens provided us with a location for the weather station and are responsible for simple maintenance tasks. It is this terminology we had in mind when drafting the manuscript.

*'Here we report on a statistically-based QC method for the crowdsourced air-temperature data of the Leuven.cool network, a citizens science network of almost 100 weather stations distributed across private gardens and (semi-) public locations in Leuven, Belgium.'* (Lines 105-107)

3. 1. 110-111: This is misleading in my opinion. It is true in your case, but a reader could get the impression that the QC could now (as it was developed and evaluated by you) be implemented in another city without other data. This is not true, as in L1.1 you also need data from an official station and since the thresholds were derived from your single network of stations and might need adjustment in other settings.

**Reply:** Thanks for this good remark. This is (unintentionally) indeed misleading. Transferring the method to other networks would indeed require the recalibration of the QC parameters. These lines are rephrased in the manuscript. In the conclusion we give a complete overview of what is needed for the QC to be transferred to another regions.

*‘The QC method only needs an official network during its development and evaluation stage. Afterwards the method can be applied independently of the official network that was used in the development phase. Transferring the method to other networks or regions would require the recalibration of the QC parameters.’ (Lines 112- 117)*

*‘Afterwards the method can be applied independently of the official network that was used in the development phase. Transferring the method to other networks or regions would require the recalibration of the QC parameters. Specifically, for QC L1.1 some indication of climate thresholds is needed. QC L1.3 and QC L2 require a dense weather station network, the QC method is thus less suitable for single or few stations. For QC L3 quite some other data (e.g., radiation, windspeed, ...) are needed. The random forest model is however easily adaptable to the parameters that are available.’ (Lines 714-719)*

4. 1. 151: “stratified sampling”. Please reword, as the number of stations does not represent the percentages (coverage) of the LCZs within the study area. As far as I understand it, the stations were installed to cover a large range of LCZ. But does the number represent the spatial coverage of the LCZ or was it mainly a choice of where a station could be (administration, finding owners, etc.)?

**Reply:** We agree that the term stratified sampling is not completely correct. The selection procedure started as a stratified sampling based on the concept of LCZs (by looking at building height, building density and vegetation cover). The goal was to divide the stations across the LCZ classes so that they would represent the spatial coverage of each LCZ. We should state that the network was implemented with the intention of gaining knowledge on the mitigating effect of green and blue infrastructures within urban settings. The initial study area thus mainly included the city centre of Leuven. As a result, the network thus has a bias towards urban classes.

Figure 1 shows the distribution of the weather stations across the LCZ classes (left panel) and proportion of LCZ classes across the initial study area (right panel). Due to the complex urban settings in which the network is deployed, practical limitations apply to the eligible locations for installation. We rely on volunteering citizens, private companies and government institutions giving permission to install a weather station on their property. Due to a technical limitation of the weather station, it cannot be installed in natural environments without a LAN connection within 50 to 100 meters of the weather station.

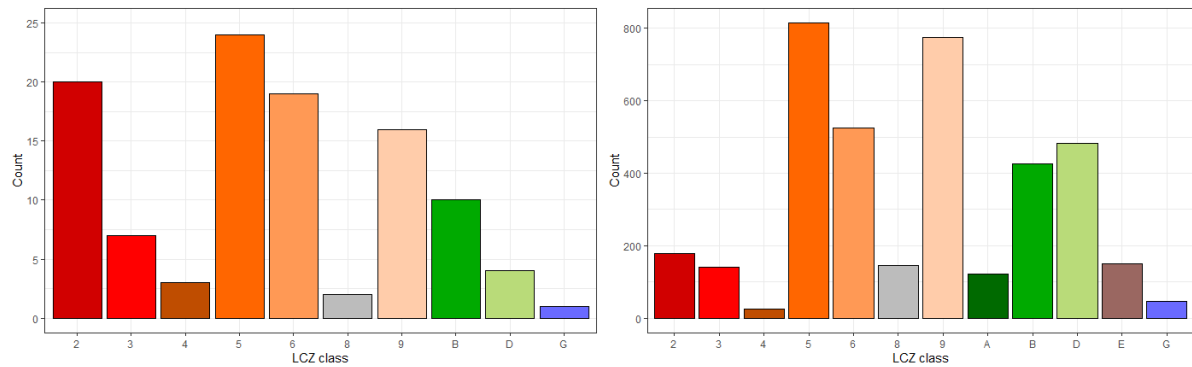

Figure 1: Distribution of weather stations across LCZ classes (left panel) and proportion of LCZ classes across study area (right panel).

*‘From July 2019 onwards the weather stations were distributed along an urban gradient from green (private) gardens to public grey locations following a sampling design based on the concept of Local Climate Zones (LCZ) (Figure 2) (Stewart & Oke, 2012).’ (Lines 158-160)*

*‘It can be noted that the weather stations are not evenly distributed across the different LCZ classes, also the number of weather station within a LCZ class does not represent the spatial coverage of this LCZ class. Due to the complex urban settings in which the network is deployed, practical limitations apply to the eligible locations for installation. We rely on volunteering citizens, private companies and government institutions giving permission to install a weather station on their property. Further, the middle-sized city of Leuven does not contain all available LCZ classes. In the urban context compact high-rise, lightweight low-rise and heavy industry is missing. In the natural context, brush or shrub vegetation, bare rock or paved and bare soil or sand are not present in sufficiently large areas (Table 2). Furthermore, the number of stations within more natural settings is limited due to the technical limitations of the weather stations; each outdoor unit needs a base station, with both power and LAN connection, within 50 to 100 meters in order to transmit its data. Lastly, the network was implemented with the intention of gaining knowledge on the mitigating effect of green and blue infrastructures within urban settings. The weather station network thus mostly focusses on urban classes. (Lines 173-183)*

**Additional note:** After submitting the manuscript in May/April 2022, we noticed that a LCZ map based on worldwide datasets, as the methodology proposed by Demuzere et al. (2021), is not optimal for fine-scale applications as the one presented here (Verdonck et al., 2017). Behind the scenes we have developed a new LCZ map based on fine-scale land use, building height, building density and green ratio data. The methodology was performed using a supervised random forest classification approach in R. All details on the LCZ map are summarised under appendix B.

Since the review process of this manuscript took longer than originally expected, it seemed more straightforward to directly update the old LCZ map with the new LCZ map. In the meantime, additional stations have been installed. The Leuven.cool networks currently counts 106 weather stations.

*‘Stewart & Oke (2012) define 17 LCZ classes, divided into 10 urban LCZs (1-10) and 7 natural LCZs (A-G). A LCZ map for Leuven was developed using a supervised random forest classification approach based on fine-scale land use, building height, building density and green ratio data. Details on this LCZ map are available in Appendix B. . Table 2 summarises the LCZs present in Leuven and the number of weather stations in each LCZ class.*

**Table 2: LCZs present in Leuven and the number of weather stations in each LCZ class.**

| <i>LCZ ID</i> | <i>LCZ description</i>    | <i># Stations (106)</i> |
|---------------|---------------------------|-------------------------|
| <i>LCZ 2</i>  | <i>Compact midrise</i>    | <i>20</i>               |
| <i>LCZ 3</i>  | <i>Compact low-rise</i>   | <i>7</i>                |
| <i>LCZ 4</i>  | <i>Open high-rise</i>     | <i>3</i>                |
| <i>LCZ 5</i>  | <i>Open midrise</i>       | <i>24</i>               |
| <i>LCZ 6</i>  | <i>Open low-rise</i>      | <i>19</i>               |
| <i>LCZ 8</i>  | <i>Large low-rise</i>     | <i>2</i>                |
| <i>LCZ 9</i>  | <i>Sparsely built</i>     | <i>16</i>               |
| <i>LCZ A</i>  | <i>Dense trees</i>        | <i>0</i>                |
| <i>LCZ B</i>  | <i>Scattered trees</i>    | <i>10</i>               |
| <i>LCZ D</i>  | <i>Low plants</i>         | <i>4</i>                |
| <i>LCZ E</i>  | <i>Bare rock or paved</i> | <i>0</i>                |
| <i>LCZ G</i>  | <i>Water</i>              | <i>1</i>                |

(Lines 165-172)

5. Table 6: Please make sure that the given parameter names are used in the same way as in the text.

**Reply:** Thanks for noticing this mistake. Adjustments were made in the manuscript.

**Table 6: Parameter settings for QC level 1 - Outlier detection.**

| <i>Outlier parameter</i>             | <i>Value (unit)</i> | <i>Description</i>                                                                                                                                         |
|--------------------------------------|---------------------|------------------------------------------------------------------------------------------------------------------------------------------------------------|
| <b><i>Range outliers (RO)</i></b>    |                     |                                                                                                                                                            |
| <i>dev_reference</i>                 | <i>1 (°C)</i>       | <i>Max allowed deviation between climatological min and max temperature of AWS stations in Uccle/Diepenbeek/Humain and LC-R in Uccle/Diepenbeek/Humain</i> |
| <i>dev</i>                           | <i>5 (°C)</i>       | <i>Max allowed deviation between climatological min and max temperature of AWS station in Uccle and LC-X in Leuven</i>                                     |
| <b><i>Temporal outliers (TO)</i></b> |                     |                                                                                                                                                            |
| <i>TOa<sub>ThresMin</sub></i>        | <i>-3 (°C)</i>      | <i>Min allowed difference between sequential 10 min observations</i>                                                                                       |
| <i>TOa<sub>ThresMax</sub></i>        | <i>2.5 (°C)</i>     | <i>Max allowed difference between sequential 10 min observations</i>                                                                                       |
| <i>TOb<sub>ThresMin</sub></i>        | <i>0.05 (°C)</i>    | <i>Min difference that should be noted in TOb<sub>Timespan</sub></i>                                                                                       |
| <i>TOb<sub>Timespan</sub></i>        | <i>19 (-)</i>       | <i>Number of consecutive 10 min observations in which temperature should change with TOb<sub>ThresMin</sub></i>                                            |
| <b><i>Spatial outliers (SO)</i></b>  |                     |                                                                                                                                                            |
| <i>range</i>                         | <i>2500 (m)</i>     | <i>Range used to define neighbouring stations</i>                                                                                                          |
| <i>SO<sub>ThresMin</sub></i>         | <i>-3 (-)</i>       | <i>Min allowed Z-score</i>                                                                                                                                 |
| <i>SO<sub>ThresMax</sub></i>         | <i>3 (-)</i>        | <i>Max allowed Z-score</i>                                                                                                                                 |



(Lines 262-264)

6. QC L1.2: Why are the values different for TOathresmax and TOathresmin? Please explain.

**Reply:** The values of  $TO_{aThresMin}$  and  $TO_{aThresMax}$  differ for meteorological reasons. The cooling down of air temperatures is meteorologically seen faster (e.g. through the passing of a cold front or thunderstorm) compared to the heating up of air temperatures. Since cold air is less dense than warm air, it will rapidly replace warmer air preceding the front's edge. Cold fronts are thus known to move faster than warm fronts hereby producing sharp changes in weather. (Ahrens, 2009).

*'The values of  $TO_{aThresMin}$  and  $TO_{aThresMax}$  differ for meteorological reasons. The cooling down of air temperatures will, from a meteorological point of view, occur faster (e.g. through the passing of a cold front or thunderstorm) compared to the heating up of air temperatures (Ahrens, 2009).'* (Lines 280-282)

7. QC L1.2: You give a threshold of 0.05 °C, yet the specified resolution of the sensor is only 0.1 °C. Of course you can obtain more digits due to the averaging, yet this does not reflect the sensor resolution. Additionally, in l. 427 you write 0.1 °C. I suggest to use 0.1 °C.

**Reply:** We understand the concern of the reviewer, but we should state that defining the temperature threshold of the persistence test has been quite time consuming. The goal of this test is to identify stations that repeatedly send out the same observation.

When setting the threshold equal to 0.1°C too many good observations were thrown away. To identify the most ideal threshold, an iterative procedure on the AWS data was performed. Here we assumed that the AWS data is correct, the persistence test should thus not return any flagged observation (or only return a limited number of flagged observations). Setting  $TO_{bThresMin}$  and  $TO_{bTimespan}$  equal to 0.05°C and 19 respectively returned the best results.

*'The results show only a few range outlier and even no spatial outliers for the LC-R reference stations. The procedure does however highlight 180 observations as temporal outliers (Table 10). These observations were highlighted during the persistence test, 180 observations change less than 0.05 °C within 2 hours.'* (Lines 459-461)

8. QC L1.3: Table 6 and text l. 275: SOthresmin and SOthresmax should be dimensionless, no?

**Reply:** Thanks for the good remark. SOthresmin and SOthresmax are indeed dimensionless. This has been adjusted in the manuscript.

Table 6: Parameter settings for QC level 1 - Outlier detection.

| Outlier parameter          | Value (unit) | Description                                                                                                                                         |
|----------------------------|--------------|-----------------------------------------------------------------------------------------------------------------------------------------------------|
| <b>Range outliers (RO)</b> |              |                                                                                                                                                     |
| <i>dev_reference</i>       | 1 (°C)       | Max allowed deviation between climatological min and max temperature of AWS stations in Uccle/Diepenbeek/Humain and LC-R in Uccle/Diepenbeek/Humain |

|            |        |                                                                                                                        |
|------------|--------|------------------------------------------------------------------------------------------------------------------------|
| <i>dev</i> | 5 (°C) | <i>Max allowed deviation between climatological min and max temperature of AWS station in Uccle and LC-X in Leuven</i> |
|------------|--------|------------------------------------------------------------------------------------------------------------------------|

---

**Temporal outliers (TO)**

---

|                    |           |                                                                                                      |
|--------------------|-----------|------------------------------------------------------------------------------------------------------|
| <i>TOaThresMin</i> | -3 (°C)   | <i>Min allowed difference between sequential 10 min observations</i>                                 |
| <i>TOaThresMax</i> | 2.5 (°C)  | <i>Max allowed difference between sequential 10 min observations</i>                                 |
| <i>TObThresMin</i> | 0.05 (°C) | <i>Min difference that should be noted in TObTimespan</i>                                            |
| <i>TObTimespan</i> | 19 (-)    | <i>Number of consecutive 10 min observations in which temperature should change with TObThresMin</i> |

---

**Spatial outliers (SO)**

---

|                   |          |                                                     |
|-------------------|----------|-----------------------------------------------------|
| <i>range</i>      | 2500 (m) | <i>Range used to define neighbouring stations</i>   |
| <i>SOThresMin</i> | -3 (-)   | <i>Min allowed Z-score</i>                          |
| <i>SOThresMax</i> | 3 (-)    | <i>Max allowed Z-score</i>                          |
| <i>nstat</i>      | 1 (-)    | <i>Minimum requirement of measurements in range</i> |

---

(Lines 262-264)

*'Whenever the Z-score is lower than -3 (SOThresMin) or higher than 3 (SOThresMax) the observation is seen as a spatial outlier and receives a flag equal to 1.'* (Lines 296-297)

9. QC L1.3: With such a low minimum number of stations ( $nstat = 1$ ) one could falsely remove values that are actually of good quality, if you check each station one by one. Consider three stations, located in a line, each 2 km apart. If the middle station produces false values, it will get flagged out because it deviates too much from the other two (good!). But similarly, checking either one of the stations on the sides will flag that station too, as it deviates too much from the middle station (which actually produces false values) (bad!). Have you investigated using a larger number of neighbours or have you solved this issue somehow differently?

**Reply:** Thanks for the comment. We have investigated this using a larger minimal number of neighbours, but the results stayed very similar for our dataset. Within our weather station network there is only 1 weather station (LC-064), situated in Lovenjoel south-east of Leuven, which only has one neighbour (LC-002). For both stations no spatial outliers were found. If the minimal number of neighbours is increased, no spatial outliers could have been calculated for LC-064.

This is however a very good remark that will be added to the Outlier settings document on the data repository.

10. QC L2: Why was the resampling done to 2 hours? Have you tried different lengths here and determined somehow the optimal duration (if so, how)? Further, are the episodes you find station specific or do they have to overlap across all stations? Please elaborate a bit further.

**Reply:** A qualitative assessment was used to define the length of the episode. If we would have taken a shorter period ( $\leq 1h$ ), there is a possibility to select a period without continuous high windspeed conditions. This could be the start of the passing of a cold front or thunderstorm or a dynamic episode during night time. These episodes should be excluded since UHI effects and other local differences will



still be present. For longer periods (> 2h), the diurnal cycle will influence the temperature measurements while we aim to select episodes with a constant temperature across Leuven.

Episodes are found by resampling the meteorological variables across all weather stations for each 2 hour interval. These intervals are filtered based on different conditions for rainfall, radiation and wind speed. The episodes are thus not station specific.

11. Training & validation & RF model: How did you split the data set of LC\_R (e.g., randomly or by time)? Do you also train the RF on each LC\_X station later on (l. 552: “In QC level 3 the random forest model is applied to each station in order to obtain a site-specific prediction ...”)? The outcome of QC L3 for LC\_R is probably not surprising, since you train on the same data set (60 % of it) and then apply the RF model to the whole data set. Is the differentiation between day and night just for illustrative purposes or actually applied in the models? This section needs better description what has been done.

**Reply:** The LC\_R dataset was randomly split in training (0.60) and validation data (0.40).

*‘For the construction of a predictor model, the dataset was randomly split in training (0.60) and validation (0.40) data.’ (Line 335)*

**Reply:** Thanks for the question. No, we do not train the RF model on each LC\_X. Once the RF model is built (based on the LC\_R), it is simply applied to each observation of the LC\_X dataset. The RF model cannot be trained on each LC-X station since no official measurement equipment is available in or nearby Leuven. Consequently, a temperature bias cannot be calculated for the LC\_X stations.

*‘In QC level 3 the random forest model is applied to each temperature observation of all LC-X stations in order to obtain a site-and time-specific prediction for its temperature bias.’ (Line 612-613)*

**Reply:** The outcome of QC L3 for the LC\_R dataset is indeed not surprising. For the creation and validation of the random forest model, the reference dataset (R01, R02, R43 & R05) is split in to training (0.6) and test data (0.4). The histograms in figure 5 and figure 6 are thus based on the test data only. However, in order to obtain a corrected temperature for each observation, during the evaluation step the random forest model is applied to the complete dataset.

We understand that this could potentially underestimate the obtained T difference ( $\Delta T = T_{LC-R} - T_{AWS}$ ). To account for this we did apply the prediction model to both the complete dataset and the test data set (which was not used for training the model). The outcome for each LC-R is listed in Table 1. It can be noted that mean T difference remains equal, while the standard deviation slightly increases with 0.5 to 0.7°C. We have added appendix D to the manuscript explaining the difference between using the complete dataset versus the test dataset. The results in the manuscript have been adjusted and are now based on the test dataset only.

*Table 1: Comparison of the obtained T difference ( $\Delta T = T_{LC-R} - T_{AWS}$ ) when using the complete LC-R dataset and the LC-R test dataset.*

| LC-R   | $\Delta T$ for complete dataset | $\Delta T$ for test dataset     |
|--------|---------------------------------|---------------------------------|
| LC-R01 | $0.01 \pm 0.24^{\circ}\text{C}$ | $0.01 \pm 0.30^{\circ}\text{C}$ |
| LC-R02 | $0.00 \pm 0.23^{\circ}\text{C}$ | $0.00 \pm 0.30^{\circ}\text{C}$ |

|        |                                 |                                 |
|--------|---------------------------------|---------------------------------|
| LC-R04 | $0.00 \pm 0.20^{\circ}\text{C}$ | $0.00 \pm 0.26^{\circ}\text{C}$ |
| LC-R05 | $0.00 \pm 0.18^{\circ}\text{C}$ | $0.00 \pm 0.23^{\circ}\text{C}$ |
| Mean   | $0.00 \pm 0.22^{\circ}\text{C}$ | $0.00 \pm 0.28^{\circ}\text{C}$ |

‘From Section 3, we recall that the random forest prediction of temperature bias showed the best results. After applying this prediction model on the reference dataset (LC-R), a level 3 corrected temperature is obtained for each LC-R station. These results could be biased since the RF model is trained on 60 % of the LC-R dataset, and then applied on the complete LC-R dataset. To account for this we did apply the prediction model to both the complete dataset and the test data set (which was not used for training the model). The outcome for each LC-R is listed in Appendix D. It can be noted that mean T difference remains equal for both datasets, the standard deviation does slightly increase with 0.5 to 0.7 °C when using the test dataset. The results below are based on the test dataset only. (Lines 544-550)

#### ‘Appendix D. Application RF model on LC-R dataset

In section 5, the RF model is applied to the LC-R dataset to obtain a corrected temperature for each observation. These results could be biased since the RF model is trained on 60 % of the LC-R dataset, and then applied on the complete LC-R dataset. To account for this we did apply the prediction model to both the complete dataset and the test data set (which was not used for training the model). The outcome for each LC-R is listed in table D1. It can be noted that mean T difference remains equal for both datasets, the standard deviation does slightly increase with 0.5 to 0.7 °C when using the test dataset only. The mean temperature difference and standard deviation for all LC-R stations increases from  $0.00 \pm 0.22^{\circ}\text{C}$  to  $0.00 \pm 0.28^{\circ}\text{C}$ .

Table D1: Comparison of the obtained T difference ( $\Delta T = T_{\text{LC-R}} - T_{\text{AWS}}$ ) when using the complete LC-R dataset and the LC-R test dataset.

| LC-R   | $\Delta T$ for complete dataset | $\Delta T$ for test dataset     |
|--------|---------------------------------|---------------------------------|
| LC-R01 | $0.01 \pm 0.24^{\circ}\text{C}$ | $0.01 \pm 0.30^{\circ}\text{C}$ |
| LC-R02 | $0.00 \pm 0.23^{\circ}\text{C}$ | $0.00 \pm 0.30^{\circ}\text{C}$ |
| LC-R04 | $0.00 \pm 0.20^{\circ}\text{C}$ | $0.00 \pm 0.26^{\circ}\text{C}$ |
| LC-R05 | $0.00 \pm 0.18^{\circ}\text{C}$ | $0.00 \pm 0.23^{\circ}\text{C}$ |
| Mean   | $0.00 \pm 0.22^{\circ}\text{C}$ | $0.00 \pm 0.28^{\circ}\text{C}$ |

For comparison the histograms and heatmaps of the temperature difference ( $\Delta T = T_{\text{LC-R}} - T_{\text{AWS}}$ ) using the complete and test dataset only have been added below in Figure D1, D2 and D3. Only slight differences smaller than 0.1°C exist between the  $\Delta T$  for complete dataset and  $\Delta T$  for test dataset. The diurnal and seasonal pattern is still corrected for (Figure D2). Also, effects of wind speed and radiation are effectively eliminated (Figure D3).

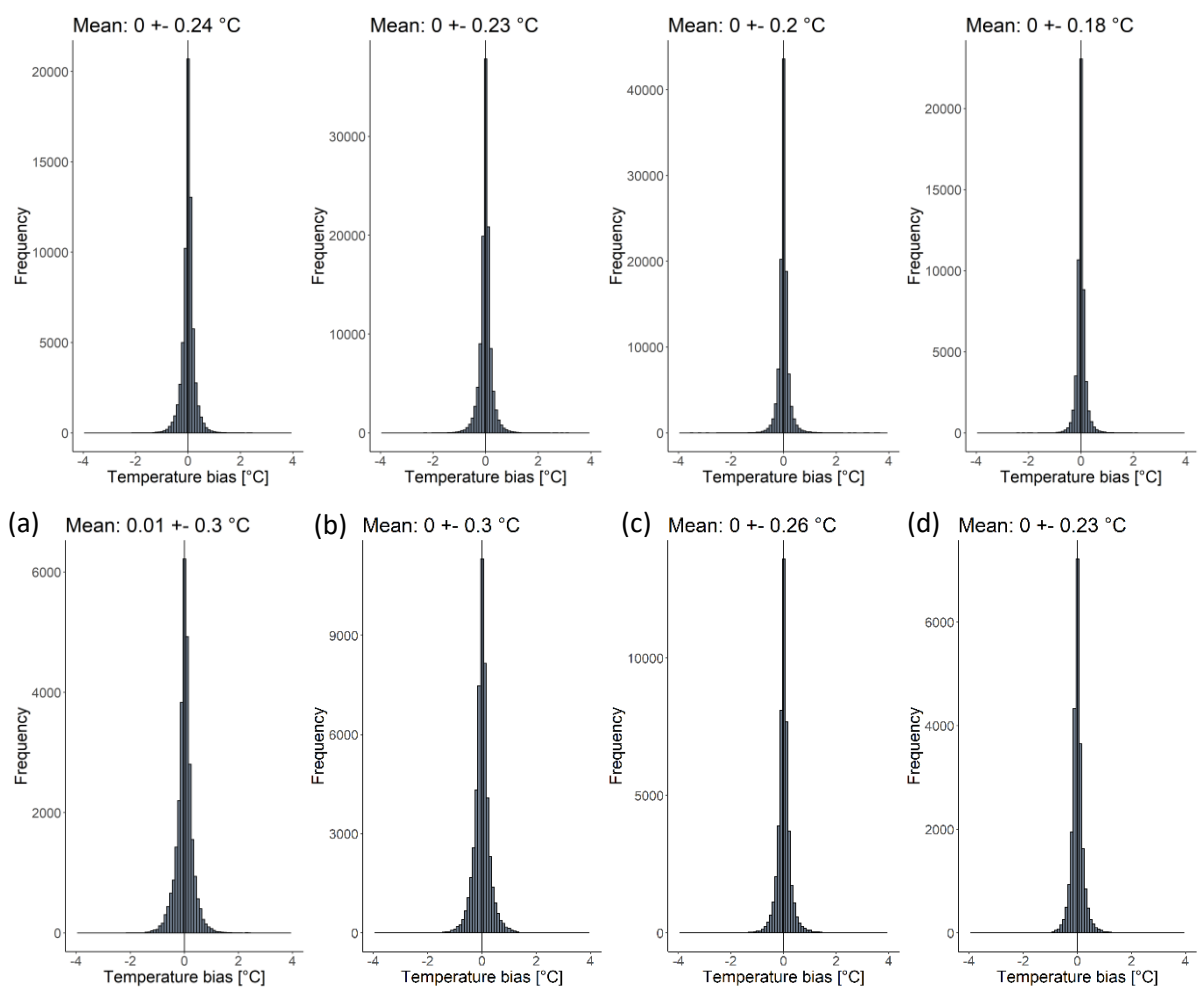

Figure D1: Same as Figure 9 for QC level 3. Comparison between  $\Delta T$  for complete dataset (upper row) and  $\Delta T$  for test dataset (lower row)

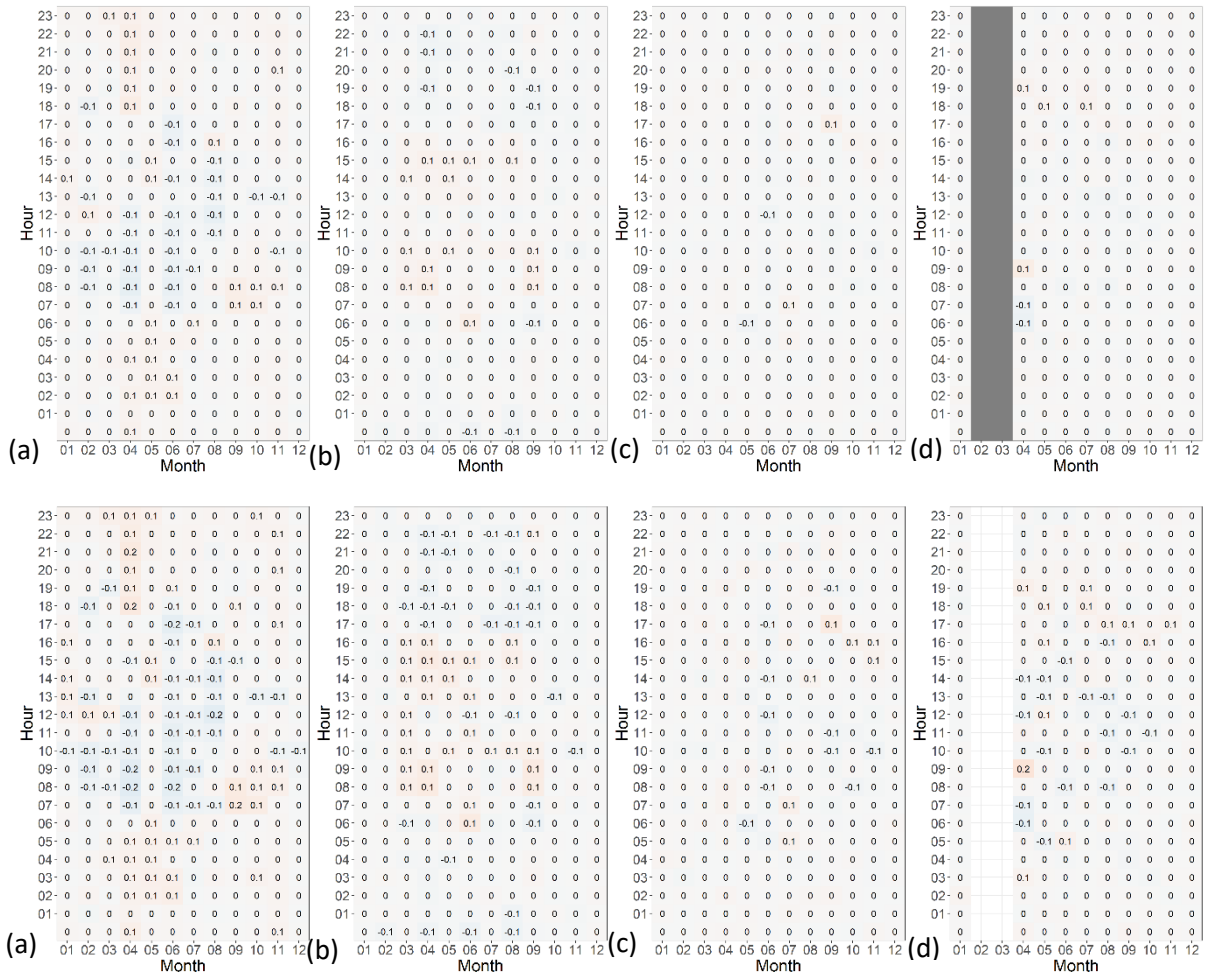

Figure D2: Same as Figure 10 for QC level 3. Comparison between  $AT$  for complete dataset (upper row) and  $AT$  for test dataset (lower row)

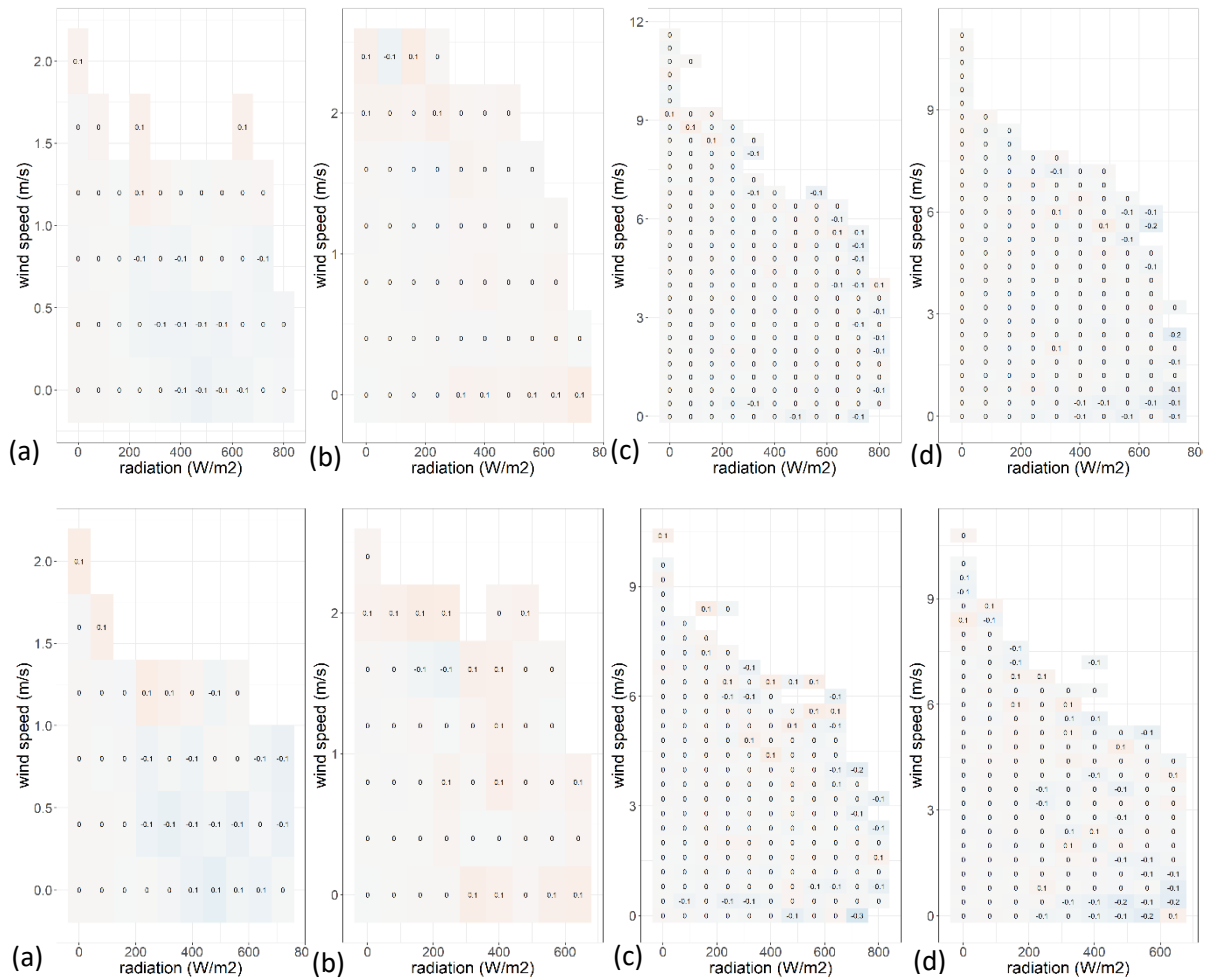

Figure D3: Same as Figure 11 for QC level 3. Comparison between  $\Delta T$  for complete dataset (upper row) and  $\Delta T$  for test dataset (lower row)

(Lines 822-850)

**Reply:** The differentiation between night and day is only for illustrative purposes. Only one RF model has been made for both day and night, the differentiation between day and night is however indirectly present in the model through the input variables “Hour”, “Radiation” and “Radiation60”.

*‘The random forest prediction of temperature bias showed the best results. By splitting up the results for day (radiation > 0 W/m2) and night (radiation = 0 W/m2) (Figure 6), a smaller standard deviation of the bias during night time (0.25) compared to daytime (0.31) is obtained. This differentiation between night and day is only for illustrative purposes, only one RF was built for both day and night. The statistical details of the random forest model are further summarized in Table 9.’ (Lines 425-428)*

12. Figure 4 and text: What is the authors explanation for the fact that largest biases are found in the middle of the radiation range and not at the top? Please elaborate a bit in the text.

**Reply:** We agree that this is indeed a bit unexpected, but our hypothesis is that it is related to the station design itself. Two effects are at play here: (1) the placement of the radiation sensor and (2) the placement of the temperature sensor. For (1), certainly for lower solar elevations (winter), the wind vane drops its

shadow at the radiation sensor for a short time of the day. For (2), which we might consider more important, the temperature sensor is more shaded around midday (highest radiation) by the body of the station (all seasons). This explains in our opinion the local minimum around noon for the summer months in the temperature bias. Note that our random forest model is capable of taking these station design flaws into account.

*‘The shallow local minimum seen around noon during the summer months (Figure 4a) and the fact that the largest biases are found in the middle of the radiation range rather than at the top (Figure 4d) are probably related to the station design itself. Two effects are at play here: (1) the placement of the radiation sensor and (2) the placement of the temperature sensor. For (1), certainly for lower solar elevations (during winter), the wind vane drops its shadow at the radiation sensor for a short time of the day. For (2), which we might consider more important, the temperature sensor is more shaded around midday (highest radiation) by the body of the station (during all seasons).’* (Lines 372-377)

13. 1. 573: You argue that your data set (since only one type of station) is free of certain effects that would require station-specific QC methods. Yet, in QC L3 you do a station-specific QC, no? Why couldn't you apply the QC to another type of weather station that measures the same variables? Please reword the sentence and/or explain better what you mean.

**Reply:** Thanks for this good remark. We did indeed correct for intrinsic differences between different weather station units during QC level 2. The sentence has been reworded.

*‘Cornes et al. (2020) further highlights the need for station specific quality controls in order to remove the confounding effect of different instrument types. With the use of a unique station type, we aimed at minimizing such effects in our dataset. QC level 2 (Sect. 5.2) showed that these effects were indeed limited.’* (Lines 635-638)

14. 1. 585: Who controls the stations and does the maintenance? Please explain in more detail.

**Reply:** The maintenance of the network is controlled by PhD students and the technical staff at the Division of Forest, Nature & Landscape of the KU Leuven and with support of the RMIB. Since most of the weather stations are installed in private gardens, our volunteers keep an eye out for generic problems as well (e.g. leaves in the rain gauge, ...).

*‘The maintenance of the network is controlled by PhD students and the technical staff at the Division of Forest, Nature & Landscape of the KU Leuven and with support of the RMIB. Since most of the weather stations are installed in private gardens, our volunteers keep an eye out for generic problems as well (e.g. leaves in the rain gauge, ...).’* (Lines 206-208)

15. Figure 20: I suggest to include the months January – June in the top sub figure, simply to have the same x range as the other two. Please also ensure that the y range is the same in all sub figures.

**Reply:** Thanks for the nice suggestion. Changes have been made in the manuscript: see figure 20

16. Figures and tables in general:



(a) Maps should contain coordinate axis.

**Reply:** Thanks for noticing. The maps have been updated with a coordinate axis: see figure 2

(b) In all figures the subplot labels a, b, c, etc. are missing. This makes it quite difficult to understand some of them and needs to be resolved.

**Reply:** Thanks for noticing. All subplots have been labelled.

(c) In many figures where different sub-figures are present the axes ranges differ. I propose to have common axes ranges per figure. Alternatively, should at least give a note in the caption that the ranges differ.

**Reply:** Thanks for the comment. The axes ranges have been changed where possible. If not possible, a note was added to the caption.

(d) In all figures with coloured background (e.g. Figure 4): Please explain the colour coding and ensure that this is the same in all sub-figures, at best in all of those figures for comparison. Further, how did you group the data (binsize, hourly averages?, etc.)?

**Reply:** The colour coding represents the temperature difference or temperature bias. The range was indeed different in different subplots. This has now been adjusted; the temperature difference/bias ranges in all figures from -1.7°C (blue) to 1.7°C (red).

Plots of the temperature difference/bias as a function of hour of the day and month of the year were made by averaging the temperature bias/difference for every hour of every month. Plots of the temperature difference/bias as a function of radiation and wind speed were made by rounding all radiation values in bins of 80 W/m<sup>2</sup> and all windspeed values in bins of 0.4 m/s. The temperature bias/difference was then averaged for each bin combination.

(e) The captions need more information regarding the data that is displayed, mainly regarding time period and data sets (this also applies to all tables).

**Reply:** Thanks for the comment. The heatmaps and histograms in section 3 and 4 are calculated from all LC-R measurements between the installation date of each LC-R and December 2021. All figures in section 5 are based on the data of all LC-X station between July 2019 and December 2021. All captions are updated with additional information on the time period and dataset.

(f) Number of figures: Several figures could be combined, e.g. Figures 9, 13, 15; Figures 10, 14, 16. Please check all figures and check (a) if they are all relevant and (b) if they could be combined. The amount of figures (20) and tables (12) is too much in my sense and should be reduced. For figures that basically display the same but only differ in the QC level, you could also write in the caption: "Same as figure X but for QC level Y".

**Reply:** We understand that 20 figures might seem like a lot, but each figure is relevant for this manuscript. Combining all figures result a huge block of figures and would deteriorate the structure of the manuscript. Currently the figures are ordered by quality control level. We have minimized the captions of Figures 13; 14, 15, 16 and 17 since they display the same output only for a different QC level. If the reviewer would like us to move some figures to the appendix, we will happily do so.

17. The authors should somewhere better describe the actual data set on the repository (e.g. which variables, which resolution, what kind of meta data, etc.). This would be extremely helpful for other researchers to make use of the data. This section could, e.g., be put before the Conclusions.

**Reply:** Thanks for the comment. On the data repository, the dataset is accompanied with an extensive README file explaining all these details. To make use of the data more toilless, a few details have been added to data and code availability section in the manuscript

*'The dataset is accompanied by an extensive README file explaining the content of the dataset. The dataset includes a metadata file (01\_Metadata.csv), the actual observations per 3 months/one quarter (LC\_YYYYQX.csv) and the R scripts needed to build and apply the QC method (LC-R\_QCL1-2-3.Rmd and LC-X\_QCL1-2-3.Rmd). The metadata file contains info on the weather station's coordinates, altitude above sea level, installation height, LCZ class, dominant landcover, mean SVF and mean building height in a buffer of 10m around each weather station. Coordinates have rounded to 3 decimals for privacy reasons. The actual observations are aggregated to 10 minutes and include Relative humidity [%], Dew point temperature [°C], Number of 16 second observations in 10 minutes aggregate, Solar radiation [W/m<sup>2</sup>], Rain intensity [mm/h], Daily rain sum [mm], Wind direction [°], Wind speed [m/s], Date in YYYY-MM-DD, Year in YYYY, Month in MM, Day in DD, Hour in HH, Minute in MM, Weighted radiation during last 60 minutes [W/m<sup>2</sup>], Temperature at QCL0 [°C], Temperature at QCL1 [°C], Temperature at QCL2 [°C], Temperature at QCL3 [°C].'* (Lines 734-743)

18. Conclusions: The authors could highlight more clearly the high value of the quality-controlled data set. The large amount of stations in a relatively small city could, e.g., enable detailed comparison with other crowdsourced data where no meta data are available and where the station setup is unknown (e.g. Netatmo). As such, the stations could act as “gatekeepers” for other stations (Chapman et al. 2017). The data set could also be of use to modellers (micro-scale modelling).

**Reply:** Thanks for the good suggestion. We have added a list of possible applications to the manuscript.

*'6. Application potential of the quality controlled and corrected Leuven.cool dataset*

*A validation of the proposed QC method showed that it is able to reduce the mean temperature difference and standard deviation from  $0.15 \pm 0.56$  °C to  $0.00 \pm 0.22$  °C. The QC method can correct the temperature difference equally across different hours of the day and months of the year (Figure 16) as well and under different radiation and windspeed conditions (Figure 17).*

*The quality-controlled Leuven.cool dataset enables a detailed comparison with other crowdsourced datasets for which less or even no metadata is available. As such, the Leuven.cool stations can serve as gatekeepers for other crowdsourced observations. In the past this role has been limited to standard weather station network which mostly only have a limited number of observations available (Chapman et al., 2017).*

*The dense dataset further allows for microscale modelling of urban weather patterns, including the urban heat island (Chapman et al., 2017; de Vos et al., 2020; Feichtinger et al., 2020; Napoly et al., 2018). Since such high-quality dataset contain measurements with both high spatial and temporal resolution, they can easily be used to obtain spatially continuous temperature patterns across a region (e.g. Feichtinger et al., 2020; Napoly et al., 2018). Interpolation methods based on single pair stations or mobile transect methods are much less trustworthy (Napoly et al., 2018). Dense weather station networks can be used to investigate the inter- and intra LCZ variability within a city (Fenner et al., 2017; Verdonck et al., 2018). The dataset can further help investigate the relation between temperature*

and human and ecosystem health (e.g. Aerts et al., 2022; Troeyer et al., 2020) and their effect on evolutionary processes (e.g. Brans et al., 2022).

*The dataset can also help refine existing weather forecast models which are currently mostly based on official rural observations (Sgoff et al., 2022). Nipen et al. (2020) showed that the inclusion of citizen observations improves the accuracy of short-term temperature forecasts in regions where official stations are sparse. Mandement & Caumont (2020) used crowdsourced weather stations to improve the observation and prediction of near convection. After quality control and correction, also the wind (Chen et al., 2021) and precipitation measurements (de Vos et al., 2019) can be useful to improve detection and forecasting. Further, the Leuven.cool dataset could be a useful input in air pollution prediction models (e.g. IFD-model (Lefebvre et al., 2011))’ (Lines 673-701)*

19. Conclusions: The authors conclude that the method is “easily transferable to other urban regions not having an official weather station”. I do not understand how the authors come to this conclusion when such information is need in QC L1.1. Also, “easily transferable” only in that sense, that quite a lot of other data are needed for the QC of air-temperature data. That is certainly not the case for the vast amount of citizen weather stations that exist, from which data could be crowdsourced. The authors should state more clearly what is needed for the QC to be transferred to another regions and reword the section.

**Reply:** Thanks for the valid comment. This is (unintentionally) indeed misleading. Transferring the method to other networks would indeed require the recalibration of the QC parameters. These lines are rephrased in the manuscript. In the conclusion we added a complete overview of what is needed for the QC to be transferred to another regions.

*‘Afterwards the method can be applied independently of the official network that was used in the development phase. Transferring the method to other networks or regions would require the recalibration of the QC parameters. Specifically, for QC L1.1 some indication of climate thresholds is needed. QC L1.3 and QC L2 require a dense weather station network, the QC method is thus less suitable for single or few stations. For QC L3 quite some other data (e.g. radiation, windspeed, ...) are needed. The random forest model is however easily adaptable to the parameters that are available.’ (Lines 714-719)*

20. Meta data in the actual data set: I noticed that latitude and longitude values are given with only three digits. I highly recommend to give at least four digits for better precision and to subsequently allow more detailed spatial analyses on the micro scale.

**Reply:** Thanks for the suggestion. Due to privacy issues and as agreed in the informed consent with our volunteers, we are however not allowed to give more than 3 digits. Most of our weather stations are installed in private gardens. We assured our volunteers that their individual gardens would not be detectable, and that the data of each weather station would be shown on a resolution of ‘street level’. When using 4 digits, the individual gardens are easily detectable.

21. Do the authors have any idea about the quality of the other variables that are measured and used in the quality control? It could make sense to have relatively simple range and persistence tests (as

you developed) implemented for all variables before the detailed QC of air temperature. Please comment on that in the text somewhere.

**Reply:** We have made a qualitative assessment of the data quality by making scatterplots of these variables for the LC-R stations, compared to the AWS data. Overall, the measured parameters are within the accuracy given by the manufacturer.

There are, however, deviations in the wind and radiation measurement that are attributable to the small location differences (in the order of meters) between the LC-R stations and the official sensors. For wind, we compared the LC-R data with professional 2m wind measurements, but this height is in fact not the standard measurement height for wind since too many ground effects are still into play at this height. For radiation, we already mentioned the design flaw regarding the wind vane dropping a shadow, but also high nearby trees can influence the measurements for low solar elevations (in the case of LC-R01 and LC-R02).

*‘A qualitative assessment of the data quality of these variables in included in Appendix C.’ (Line 204)*

### ***‘Appendix C. Quality control other Leuven.cool variables***

*A qualitative assessment of the data quality was performed by making scatterplots of these variables for the LC-R stations compared to the AWS stations (Figure C1).*

*Overall, the measured parameters are within the accuracy given by the manufacturer. There are, however, deviations in the wind and radiation measurement that are attributable to the small location differences (in the order of meters) between the LC-R stations and the official sensors. For wind, we compared the LC-R data with professional 2m wind measurements, but this height is in fact not the standard measurement height for wind since too many ground effects are still into play at this height. For radiation, we already mentioned the design flaw regarding the wind vane dropping a shadow, but also high nearby trees can influence the measurements for low solar elevations (in the case of LC-R01 and LC-R02).*

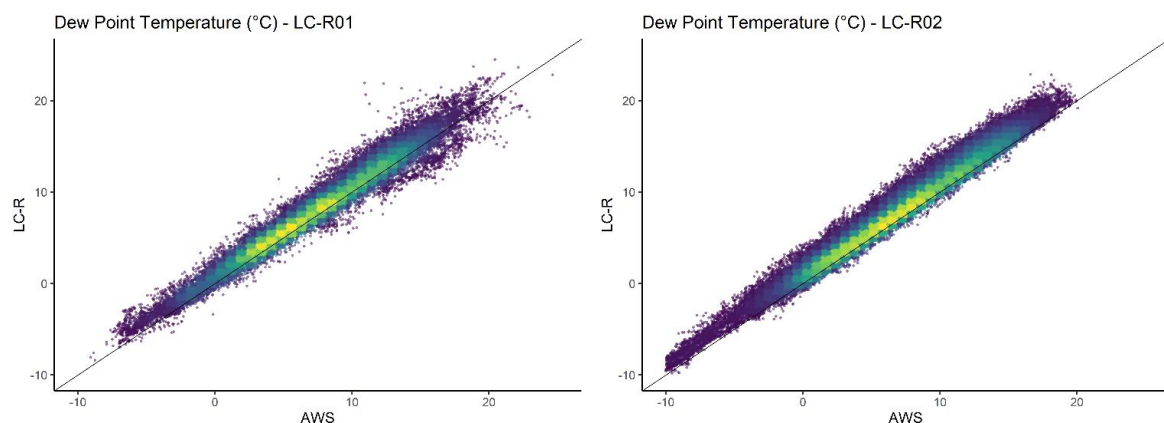

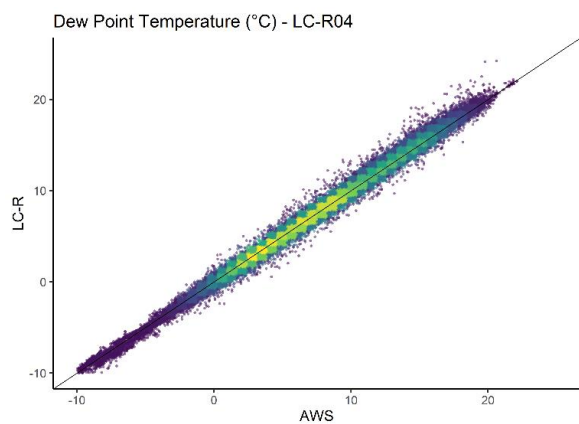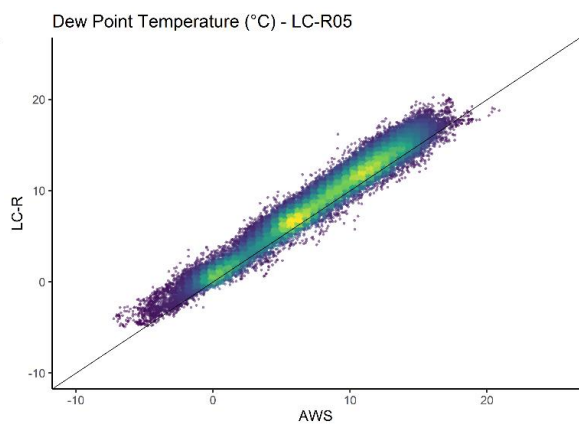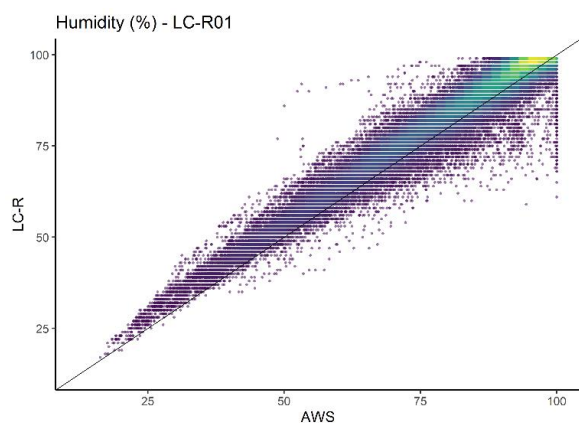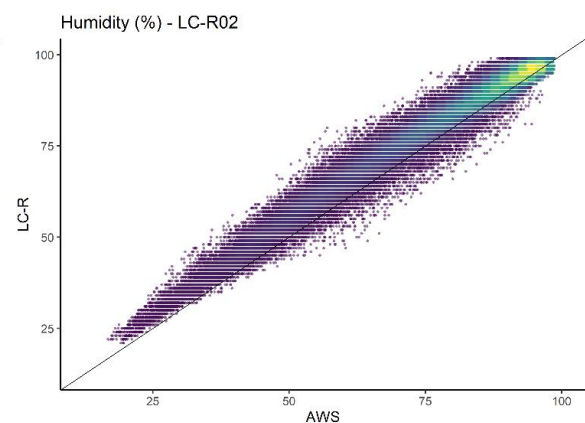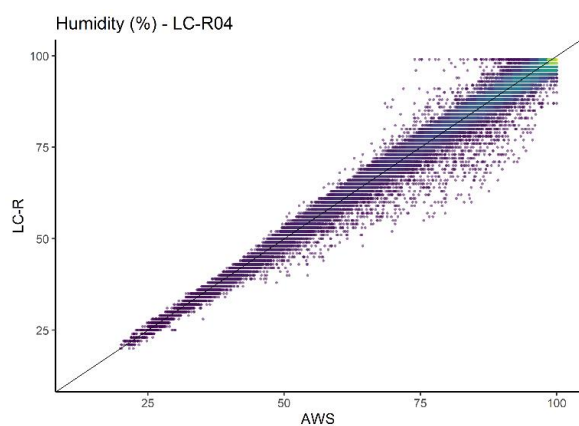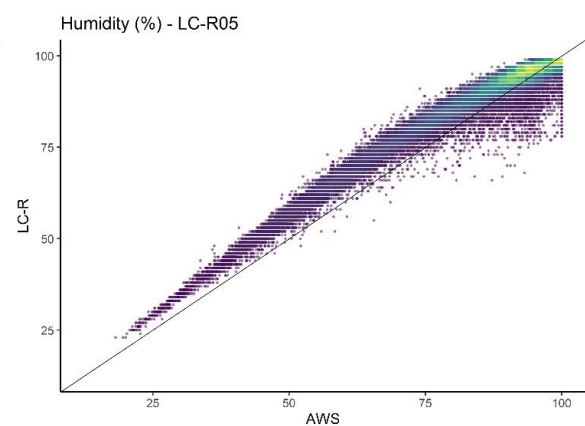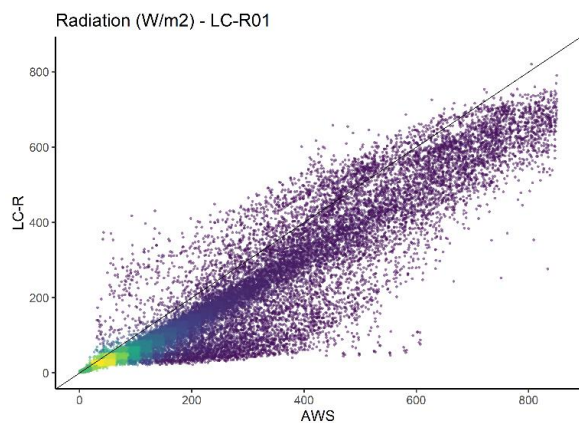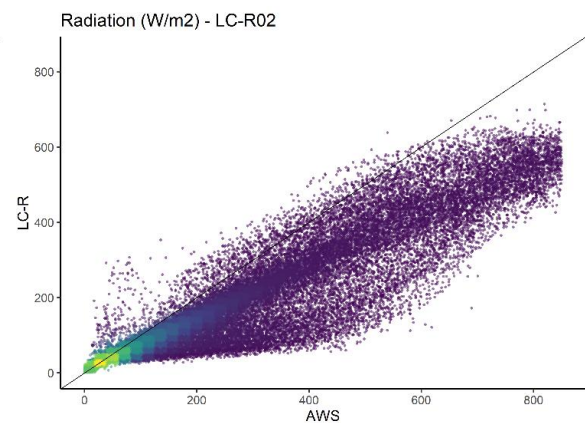



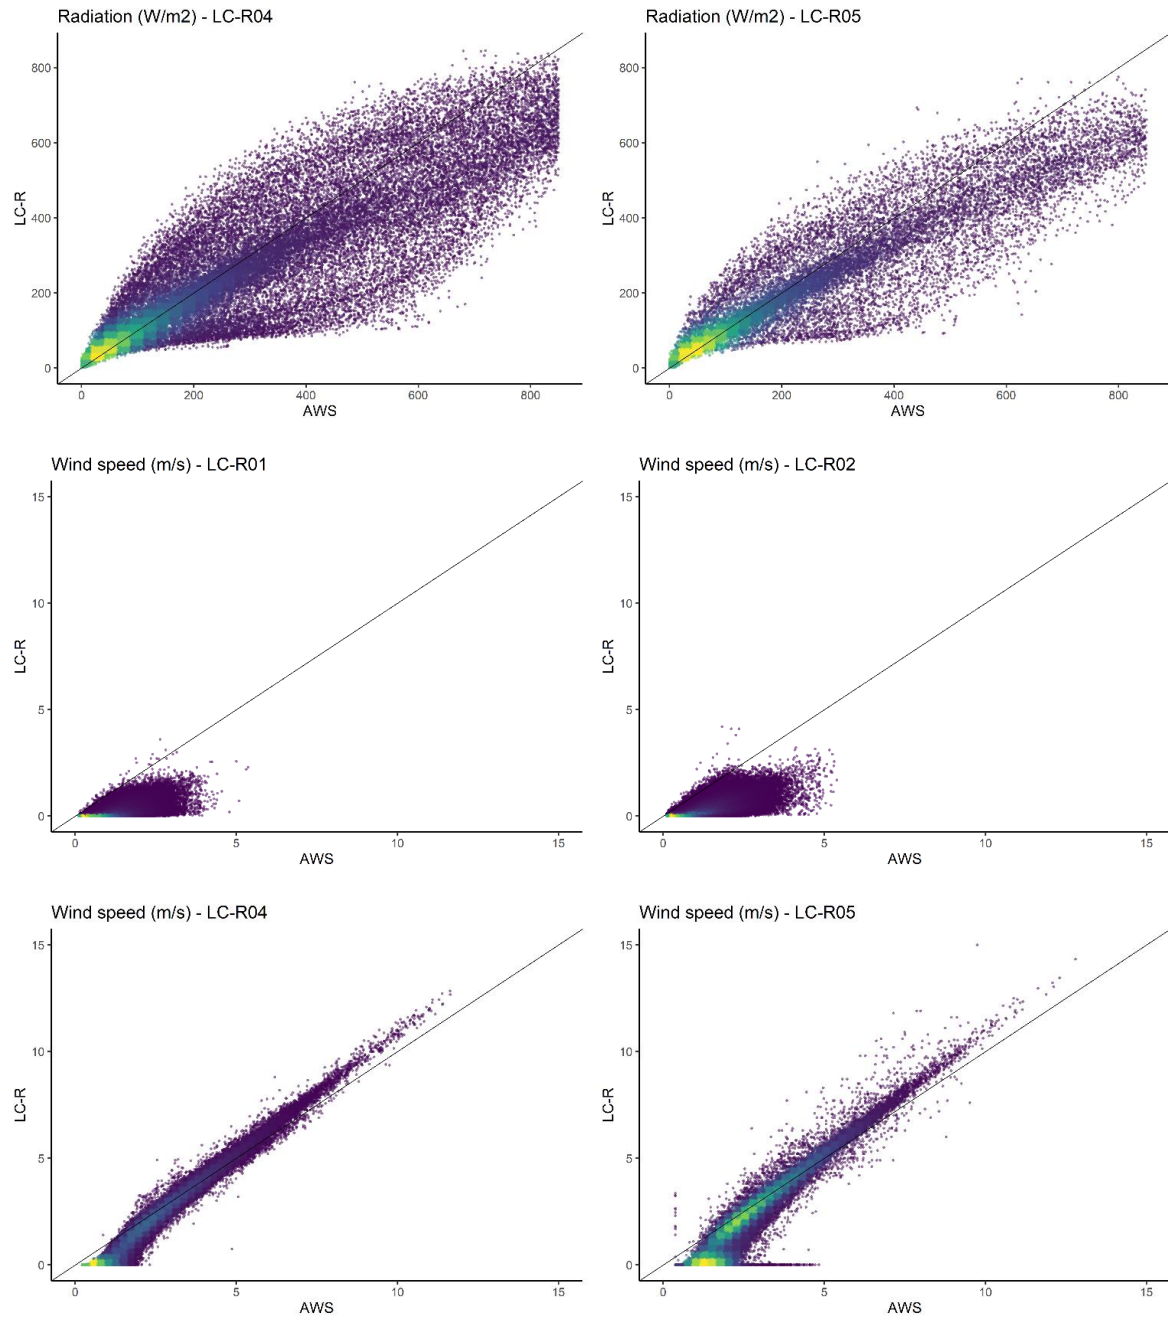

*Figure C1: Scatterplots of LC-R versus AWS dew point temperature, humidity, radiation and wind speed for each reference station LC-R01, LC-R02, LC-R04, LC-R05. The identity line is shown in black. The colour scale indicates the density of observations, yellow indicating the highest, purple the lowest. The scatterplots include all measurements between the installation data of each LC-R and December 2021. For each variable the same ranges of x- and y-axis are used.'*

(Lines 798-820)



**Technical corrections:**

- Compound adjective (e.g. “air temperature” but “air-temperature data”). Please check the whole manuscript carefully

**Reply:** Thanks for the correction. This has been adjusted in the manuscript

- l. 32: consider “... that both cities and their citizens are ...”

**Reply:** Thanks for the suggestion. This has been adjusted in the manuscript.

- l. 50: “... in which air temperature is continuously modelled ...”

**Reply:** Thanks for the correction. This has been adjusted in the manuscript

- l. 101: consider “Thus, there is a need for ...”

**Reply:** Thanks for the suggestion. This has been adjusted in the manuscript.

- l. 104: “Here we report on a ...”

**Reply:** Thanks for the suggestion. This has been adjusted in the manuscript.

- l. 169: “... is limited due to the ...”

**Reply:** Thanks for the suggestion. This has been adjusted in the manuscript.

- l. 178: “direct effect contact” ? Please reword.

**Reply:** Thanks for the correction. This has been adjusted in the manuscript.

*‘Weather stations located on public impervious surfaces were installed on available light poles using specially designed L-structures to avoid direct contact with the pole.’ (Lines 190-192)*

- l. 182: “aggregated” – Do you mean temporally averaged?

**Reply:** Thanks for the comments. We indeed mean temporally averaged. This has been adjusted in the manuscript.

*‘The raw 16 seconds measurements are aggregated (temporally averaged) to 10 minutes observations.’ (Lines 195-196)*

- l. 194 (and other instances in the text, Table A1): There should be a space between the number and the unit, except for geographical degrees; cf. chapter 5.4.3 in <https://www.bipm.org/documents/20126/41483022/SIBrochure-9.pdf/fcf090b2-04e6-88cc-1149-c3e029ad8232>).

**Reply:** Thanks for the correction. This has been adjusted in the manuscript.

- l. 266-267: Please check sentence and reword.

**Reply:** Thanks for the comment. This has been adjusted in the manuscript.

*‘Whenever the difference between sequential observations cannot be calculated an observation gets a flag equal to -1.’ (Lines 287-288)*

- l. 285: “non-negligible” – How did you determine that? What is the basis for the statement?

**Reply:** A temperature difference of 0.2°C was found. Such a difference cannot be explained by the resolution of the temperature sensor (0.1°C) and is thus non negligible.

*‘A temperature difference of 0.2°C was found, which cannot be explained by the resolution of the temperature sensor (0.1°C).’ (Lines 306-307)*

- l. 298: “i.e.” is instead of “e.g.”

**Reply:** Thanks for the correction. This has been adjusted in the manuscript.

- l. 300: Could be helpful to say “... across all ten selected episodes is considered ...”

**Reply:** Thanks for the suggestion but that would be incorrect. First, the query is performed for every 6-months period, resulting in 10 episodes times the number of 6-month period assessed. The analysis is currently done from 2019S2 until 2021S2, resulting in 5 6-month periods x 10 episodes = 50 episodes. Afterwards temperature is regressed versus altitude and only the episodes with a high correlation between temperature and altitude ( $> 0.7$ ) are kept.

- Table 7: What is actually shown here? What kind of correlation coefficient? Per definition, a correlation coefficient has no units. Please remove them and specify more clearly in the caption what is shown.

**Reply:** Thanks for the valid remark. Table 7 shows the Pearson correlation coefficient between the observed temperature bias and other variables measured by the weather station. The units are indeed incorrect, they have been removed.

*Table 7: Pearson correlation matrix of temperature bias with other meteorological variables measured by the low-cost station.*

| <i>Temperature</i> | <i>Dew point<br/>temperature</i> | <i>Humidity</i> | <i>Radiation</i> | <i>Radiation60</i> | <i>Wind speed</i> |
|--------------------|----------------------------------|-----------------|------------------|--------------------|-------------------|
| <i>0.41</i>        | <i>0.18</i>                      | <i>-0.48</i>    | <i>0.49</i>      | <i>0.56</i>        | <i>-0.01</i>      |

(Lines 391-393)

- Figure 8: What is the black line? Please explain in the caption.

**Reply:** the black line indicates the identity line or line of equality. This has been further explained in the caption

*‘Figure 8: Scatterplots of LC-R versus AWS temperature for each reference station LC-R01 (a), LC-R02 (b), LC-R04 (c), LC-R05 (d) at QC level 0. Observations defined as range outliers are symbolized by a red circle, temporal outliers by a red square. The identity line is shown in black. The colour scale indicates the density of observations, white indicating the highest, black the lowest. The scatterplots include all measurements between the installation data of each LC-R and December 2021.’ (Lines 475-479)*

- l. 447 & 448: Where is the information regarding the summer day shown? Please specify or reword.

**Reply:** Thanks for the valid comment. The information for one summer day is indeed not shown individually. From figures 10 and 11 we can deduce that a higher difference is obtained during the summer months (Figure 10) under low cloud and low windspeed conditions (Figure 11).

*‘As expected, the temperature difference between the LC-R and AWS stations is not constant and is correlated with other variables. A higher difference is obtained during the summer months (Figure 10) under low cloud and low windspeed conditions (Figure 11).’* (Lines 483-485)

## References:

- Aerts, R., Vanlessen, N., Dujardin, S., Nemery, B., Van Nieuwenhuyse, A., Bauwelinck, M., Casas, L., Demoury, C., Plusquin, M., & Nawrot, T. S. (2022). Residential green space and mental health-related prescription medication sales: An ecological study in Belgium. *Environmental Research*, 211. <https://doi.org/10.1016/j.envres.2022.113056>
- Ahrens, C. D. (2009). *Meteorology Today: An Introduction to Weather, Climate, and the Environment* (Ninth Edit). Brooks/Cole.
- Båserud, L., Lussana, C., Nipen, T. N., Seierstad, I. A., Oram, L., & Aspelien, T. (2020). TITAN automatic spatial quality control of meteorological in-situ observations. *Advances in Science and Research*, 17, 153–163. <https://doi.org/10.5194/asr-17-153-2020>
- Bell, S., Cornford, D., & Bastin, L. (2015). How good are citizen weather stations? Addressing a biased opinion. *Weather*, 70(3), 75–84. <https://doi.org/10.1002/wea.2316>
- Brans, K. I., Tüzün, N., Sentis, A., De Meester, L., & Stoks, R. (2022). Cryptic eco-evolutionary feedback in the city: Urban evolution of prey dampens the effect of urban evolution of the predator. *Journal of Animal Ecology*, 91(3), 514–526. <https://doi.org/10.1111/1365-2656.13601>
- Chapman, L., Bell, C., & Bell, S. (2017). Can the crowdsourcing data paradigm take atmospheric science to a new level? A case study of the urban heat island of London quantified using Netatmo weather stations. *International Journal of Climatology*, 37(9), 3597–3605. <https://doi.org/10.1002/joc.4940>
- Chen, Y., Weng, Q., Tang, L., Liu, Q., Zhang, X., & Bilal, M. (2021). Automatic mapping of urban green spaces using a geospatial neural network. *GIScience & Remote Sensing*, 00(00), 1–19. <https://doi.org/10.1080/15481603.2021.1933367>
- Cornes, R. C., Dirksen, M., & Sluiter, R. (2020). Correcting citizen-science air temperature measurements across the Netherlands for short wave radiation bias. *Meteorological Applications*, 27(1), 1–16. <https://doi.org/10.1002/met.1814>
- de Vos, Droste, A. M., Zander, M. J., Overeem, A., Leijnse, H., Heusinkveld, B. G., Steeneveld, G. J., & Uijlenhoet, R. (2020). Hydrometeorological monitoring using opportunistic sensing networks in the Amsterdam metropolitan area. *Bulletin of the American Meteorological Society*, 101(2), E167–E185. <https://doi.org/10.1175/BAMS-D-19-0091.1>
- de Vos, L., Leijnse, H., Overeem, A., & Uijlenhoet, R. (2019). Quality Control for Crowdsourced Personal Weather Stations to Enable Operational Rainfall Monitoring. *Geophysical Research Letters*, 46(15), 8820–8829. <https://doi.org/10.1029/2019GL083731>
- Feichtinger, M., Wit, R. De, Goldenits, G., Kolejka, T., & Hollósi, B. (2020). Urban Climate Case-study of neighborhood-scale summertime urban air temperature for the City of Vienna using crowd-sourced data. *Urban Climate*, 32(August 2019), 1–12. <https://doi.org/10.1016/j.uclim.2020.100597>
- Fenner, D., Meier, F., Bechtel, B., Otto, M., & Scherer, D. (2017). Intra and inter “local climate zone” variability of air temperature as observed by crowdsourced citizen weather stations in Berlin, Germany. *Meteorologische Zeitschrift*, 26(5), 525–547. <https://doi.org/10.1127/metz/2017/0861>
- Jenkins, G. (2014). A comparison between two types of widely used weather stations. *Weather*, 69(4), 105–110. <https://doi.org/10.1002/wea.2158>
- Lefebvre, W., Vercauteren, J., Schrooten, L., Janssen, S., Degraeuwe, B., Maenhaut, W., de Vlieger, I., Vankerkom, J., Cossemans, G., Mensink, C., Veldeman, N., Deutsch, F., Van Looy, S., Peelaerts, W., & Lefebvre, F. (2011). Validation of the MIMOSA-AURORA-IFDM model chain for policy support: Modeling concentrations of elemental carbon in Flanders. *Atmospheric Environment*, 45(37), 6705–6713. <https://doi.org/10.1016/j.atmosenv.2011.08.033>

- Longman, R. J., Giambelluca, T. W., Nullet, M. A., Frazier, A. G., Kodama, K., Crausbay, S. D., Krushelnycky, P. D., Cordell, S., Clark, M. P., Newman, A. J., & Arnold, J. R. (2018). Compilation of climate data from heterogeneous networks across the Hawaiian Islands. *Scientific Data*, 5(1), 180012. <https://doi.org/10.1038/sdata.2018.12>
- Mandement, M., & Caumont, O. (2020). Contribution of personal weather stations to the observation of deep-convection features near the ground. *Natural Hazards and Earth System Sciences*, 20(1), 299–322. <https://doi.org/10.5194/nhess-20-299-2020>
- Meier, F., Fenner, D., Grassmann, T., Otto, M., & Scherer, D. (2017). Crowdsourcing air temperature from citizen weather stations for urban climate research. *Urban Climate*, 19(February), 170–191. <https://doi.org/10.1016/j.uclim.2017.01.006>
- Muller, C. L., Chapman, L., Johnston, S., Kidd, C., Illingworth, S., Foody, G., Overeem, A., & Leigh, R. R. (2015). Crowdsourcing for climate and atmospheric sciences: Current status and future potential. *International Journal of Climatology*, 35(11), 3185–3203. <https://doi.org/10.1002/joc.4210>
- Napoly, A., Grassmann, T., Meier, F., & Fenner, D. (2018). Development and Application of a Statistically-Based Quality Control for Crowdsourced Air Temperature Data. *Frontiers in Earth Science*, 6(August), 1–16. <https://doi.org/10.3389/feart.2018.00118>
- Nipen, T. N., Seierstad, I. A., Lussana, C., Kristiansen, J., & Hov, Ø. (2020). Adopting citizen observations in operational weather prediction. *Bulletin of the American Meteorological Society*, 101(1), E43–E57. <https://doi.org/10.1175/BAMS-D-18-0237.1>
- Sgoff, C., Acevedo, W., Paschalidi, Z., Ulbrich, S., Bauernschubert, E., Kratzsch, T., & Potthast, R. (2022). Assimilation of crowd-sourced surface observations over Germany in a regional weather prediction system. *Quarterly Journal of the Royal Meteorological Society*, 148(745), 1752–1767. <https://doi.org/10.1002/qj.4276>
- Stewart, I. D. (2011). A systematic review and scientific critique of methodology in modern urban heat island literature. *International Journal of Climatology*, 31, 200–217. <https://doi.org/10.1002/joc.2141>
- Stewart, I. D., & Oke, T. R. (2012). Local climate zones for urban temperature studies. *Bulletin of the American Meteorological Society*, 93(12), 1879–1900. <https://doi.org/10.1175/BAMS-D-11-00019.1>
- Troeyer, K. De, Bauwelinck, M., Aerts, R., Profer, D., Berckmans, J., Delcloo, A., Hamdi, R., Schaeybroeck, B. Van, Hooyberghs, H., Lauwaet, D., Demoury, C., & Nieuwenhuyse, A. Van. (2020). Heat related mortality in the two largest Belgian urban areas : A time series analysis. *Environmental Research*, 188(February), 109848. <https://doi.org/10.1016/j.envres.2020.109848>
- Venter, Z. S., Chakraborty, T., & Lee, X. (2021). Crowdsourced air temperatures contrast satellite measures of the urban heat island and its mechanisms. *Science Advances*, 7(22), 1–9. <https://doi.org/https://dx.doi.org/10.1126/sciadv.abb9569>
- Verdonck, M. L., Demuzere, M., Hooyberghs, H., Beck, C., Cyrus, J., Schneider, A., Dewulf, R., & Van Coillie, F. (2018). The potential of local climate zones maps as a heat stress assessment tool, supported by simulated air temperature data. *Landscape and Urban Planning*, 178(July 2017), 183–197. <https://doi.org/10.1016/j.landurbplan.2018.06.004>
- Verdonck, M. L., Okujeni, A., van der Linden, S., Demuzere, M., De Wulf, R., & Van Coillie, F. (2017). Influence of neighbourhood information on ‘Local Climate Zone’ mapping in heterogeneous cities. *International Journal of Applied Earth Observation and Geoinformation*, 62(September 2016), 102–113. <https://doi.org/10.1016/j.jag.2017.05.017>
- Zheng, F., Tao, R., Maier, H. R., See, L., Savic, D., Zhang, T., Chen, Q., Assumpção, T. H., Yang, P.,

Heidari, B., Rieckermann, J., Minsker, B., Bi, W., Cai, X., Solomatine, D., & Popescu, I. (2018). Crowdsourcing Methods for Data Collection in Geophysics: State of the Art, Issues, and Future Directions. *Reviews of Geophysics*, 56(4), 698–740. <https://doi.org/10.1029/2018RG000616>
